# Supplementary material for: Width of Gene Expression Profile Drives Alternative Splicing
Source: PLoS One. 2008 Oct 31;3(10):e3587. doi: 10.1371/journal.pone.0003587 (PMC2575406; doi:10.1371/journal.pone.0003587)
Supplement: Table S1 — List of functional classes, used in this paper, for the three GO ontologies, to describe the function of MS and PS genes (see main text). (0.10 MB XLS) [file pone.0003587.s009.xls]

## Sheet: Sheet1
GO ontology	Functional classes	Subclasses
Biological process	cellular process (GO:0009987)	cell communication (GO:0007154)
		cell death (GO:0008219)
		cell differentiation (GO:0030154)
		cell motility (GO:0006928)
		cellular physiological process (GO:0050875)
		extracellular structure organization and biogenesis (GO:0043062)
		membrane fusion (GO:0006944)
		transport (GO:0006810)
	development (GO:0007275)
	metabolism (GO:0008152) includes:	amino acid and derivative metabolism (GO:0006519)
		biosynthesis (GO:0009058)
		catabolism (GO:0009056)
		electron transport (GO:0006118)
		macromolecule metabolism (GO:0043170)
		nucleobase, nucleoside, nucleotide and nucleic acid metabolism (GO:0006139)
	pathogenesis (GO:0009405)
	physiological process (GO:0007582)
	regulation of biological process (GO:0050789)
	response to stimulus (GO:0050896)	behavior (GO:0007610)
	secretion (GO:0046903)
	biological process unknown (GO:0000004)
Molecular function	antioxidant activity (GO:0016209)
	binding (GO:0005488)	nucleic acid binding (GO:0003676)
		protein binding (GO:0005515)
	catalytic activity (GO:0003824	helicase activity (GO:0004386)
		electron transporter activity (GO:0005489)
		aromatase activity (GO:0008402)
		integrase activity (GO:0008907)
		kinase activity (GO:0016301)
		oxidoreductase activity (GO:0016491)
		transferase activity (GO:0016740)
		hydrolase activity (GO:0016787)
		lyase activity (GO:0016829)
		isomerase activity (GO:0016853)
		ligase activity (GO:0016874
	chaperone regulator activity (GO:0030188)
	enzyme regulator activity (GO:0030234)
	motor activity (GO:0003774)
	signal transducer activity (GO:0004871)	receptor activity (GO:0004872)
	structural molecule activity (GO:0005198)
	transcription regulator activity (GO:0030528)
	translation regulator activity (GO:0045182)
	transporter activity (GO:0005215)	carrier activity (GO:0005386)
		protein transporter activity (GO:0008565)
		ion transporter activity (GO:0015075)
		channel or pore class transporter activity (GO:0015267)
		permease activity (GO:0015646)
	molecular function unknown (GO:0005554)
Cellular component	cell (GO:0005623)
	cell surface (GO:0009986)
	membrane (GO:0016020)
	intracellular (GO:0005622)
	cytoplasm (GO:0005737)
	nucleus (GO:0005634)
	chromosome (GO:0005694)
	external encapsulating structure (GO:0030312)
	extracellular region (GO:0005576)	extracellular matrix (sensu Metazoa) (GO:0005578)
		extracellular space (GO:0005615)
	cellular component unknown (GO:0008372)	unlocalized protein complex (GO:0005941)
