# Supplementary material for: Width of Gene Expression Profile Drives Alternative Splicing
Source: PLoS One. 2008 Oct 31;3(10):e3587. doi: 10.1371/journal.pone.0003587 (PMC2575406; doi:10.1371/journal.pone.0003587)
Supplement: Table S3 — Pearson correlation coefficients between the number of functional groups, when comparing the three GO categories, for MS and PS genes. 1. The correlation was computed when considering only the genes annotated in both functional categories. 2. We included the genes that were uncharacterized in one or the two functional categories. (0.10 MB XLS) [file pone.0003587.s011.xls]

## Sheet: Sheet1
			Biological Process	Molecular Function
Molecular Function	MS genes	all	r = 0.244 p<0.001
		including uncharacterized	r = 0.735 p<0.001
	PS genes	all	r = 0.239 p<0.001
		including uncharacterized	r = 0.580 p<0.001
Cellular Component	MS genes	all	r = 0.248 p<0.001	r = 0.150 p<0.001
		including uncharacterized	r = 0.670 p<0.001	r = 0.633 p<0.001
	PS genes	all	r = 0.237 p<0.001	r = 0.100 p<0.001
		including uncharacterized	r = 0.518 p<0.001	r = 0.408 p<0.001
